# Supplementary material for: Effects of Taurine Depletion on Body Weight and Mouse Behavior during Development
Source: MDPI journal article supplement (doi:10.3390/metabo12070631), 2022-07-09
Supplement: s1 [file s1]

**Table S1.** Effects of taurine depletion on protein expression and phosphorylation by protein microarray analysis.

| Target Protein Name | Phospho Site (Human) | Full Target Protein Name                                           | %CFC |
|---------------------|----------------------|--------------------------------------------------------------------|------|
| STAT3               | Y705                 | Signal transducer and activator of transcription 3                 | 9449 |
| MKK6                | Pan-specific         | MAPK/ERK protein-serine kinase 6 (MKK6)                            | 116  |
| GRK2                | Pan-specific         | G protein-coupled receptor-serine kinase 2                         | 109  |
| PAK4                | S474                 | p21-activated kinase 4                                             | 101  |
| FRK                 | Y387                 | Tyrosine-protein kinase FRK                                        | 97   |
| JAK3                | Pan-specific         | Janus protein-tyrosine kinase 3                                    | 91   |
| Hsp47               | Pan-specific         | Heat shock 47 kDa protein (collagen-binding protein 1, colligin 1) | 82   |
| Snk                 | Pan-specific         | Polo-like protein kinase 2 (serum -inducible kinase (SNK))         | 77   |
| EGFR                | Pan-specific         | Epidermal growth factor receptor-tyrosine kinase                   | 75   |
| PRK2                | Pan-specific         | Protein kinase C-related protein-serine kinase 2                   | 73   |
| DUSP9               | Pan-specific         | Dual specificity protein phosphatase 9                             | 73   |
| SOCS2               | Pan-specific         | Suppressor of cytokine signaling 2                                 | 65   |
| Ikbα                | Pan-specific         | Inhibitor of NF-κappa-B α (MAD3)                                   | 63   |
| STAT2               | Pan-specific         | Signal transducer and activator of transcription 2                 | 61   |
| Ikbβ                | Pan-specific         | Inhibitor of NF-κappa-B β (thyroid receptor interacting protein 9) | 57   |
| MEK3                | Pan-specific         | MAPK/ERK protein-serine kinase 3 β isoform (MKK3 β)                | 55   |
| Catenin β           | Pan-specific         | Catenin (cadherin-associated protein) β 1                          | 55   |
| Cdc2 p34            | Pan-specific         | Cyclin-dependent protein-serine kinase 1                           | 55   |
| ErbB2               | Pan-specific         | ErbB2 (Neu) receptor-tyrosine kinase                               | 54   |
| JAK3                | Y980+Y981            | Janus protein-tyrosine kinase 3                                    | 51   |
| A-Raf               | Pan-specific         | A-Raf proto-oncogene serine/threonine-protein kinase               | 51   |
| NFκappaB p65        | Pan-specific         | NF-κappa-B p65 nuclear transcription factor                        | 49   |
| SODD                | Pan-specific         | Silencer of death domains (Bcl2 associated athanogene 4 (BAG4))    | 56   |
